# Supplementary material for: Quantifying brain-functional dynamics using deep dynamical systems: Technical considerations
Source: PubMed Central journal article supplement — iScience. 2024 Jul 22;27(8):110545. doi: 10.1016/j.isci.2024.110545 (PMC11334782; doi:10.1016/j.isci.2024.110545), 2024-07-22
Supplement: mmc1.pdf [file mmc1.pdf]

iScience, Volume 27

## **Supplemental information**

### **Quantifying brain-functional dynamics using deep dynamical systems: Technical considerations**

**Jiarui Chen, Anastasia Benedyk, Alexander Moldavski, Heike Tost, Andreas Meyer-Lindenberg, Urs Braun, Daniel Durstewitz, Georgia Koppe, and Emanuel Schwarz**

**Table S1.** Age and gender distribution with p-value from the statistical test, related to “Dataset for Pipeline Implementation and Evaluation” section in STAR Methods.

| Group  | HC                  |                    | SCZ     |         | MDD     |         | P-value <sup>2</sup> |        |
|--------|---------------------|--------------------|---------|---------|---------|---------|----------------------|--------|
|        | N/Mean <sup>1</sup> | %/STD <sup>1</sup> | N/Mean  | %/STD   | N/Mean  | %/STD   |                      |        |
| Gender | M                   | 22                 | 52.381  | 28      | 60.8696 | 19      | 43.1819              | 0.2441 |
|        | F                   | 20                 | 47.619  | 18      | 39.1304 | 25      | 56.8182              |        |
| Age    |                     | 36.4762            | 12.4572 | 38.1957 | 11.3463 | 35.4546 | 11.1782              | 0.5306 |

**Abbr.** HC–Healthy Controls, SCZ–Schizophrenia, MDD–Major Depressive Disorder, M– male, F– female, N–number, STD–standard deviation.

<sup>1</sup>For age, we calculate the mean and standard deviation, while for gender, we count the number and calculate the percentage.

<sup>2</sup>We perform ANOVA and the chi-square test for age and sex respectively.

**Table S2.** The names of the 19 regions of interest (ROIs), related to “Dataset for Pipeline Implementation and Evaluation” section in STAR Methods.

| Index | Region Name                             | Index | Region Name                                 |
|-------|-----------------------------------------|-------|---------------------------------------------|
| 1     | Precentral Gyrus                        | 11    | Supramarginal Gyrus - Posterior Division    |
| 2     | Postcentral Gyrus                       | 12    | Cingulate Gyrus – Anterior Division         |
| 3     | Juxtapositional Lobule Cortex           | 13    | Superior Temporal Gyrus - Anterior Division |
| 4     | Left Thalamus                           | 14    | Left Putamen                                |
| 5     | Right Thalamus                          | 15    | Right Putamen                               |
| 6     | Frontal Medial Cortex                   | 16    | Left Caudate                                |
| 7     | Precuneus Cortex                        | 17    | Right Caudate                               |
| 8     | Superior Frontal Gyrus                  | 18    | Insular Cortex                              |
| 9     | Superior Parietal Lobule                | 19    | Frontal Pole                                |
| 10    | Supramarginal Gyrus - Anterior Division | —     | —                                           |

**Table S3.** Description of the 18 extracted dynamical features<sup>1,2</sup>, related to “PLRNN Model for Dynamics Reconstruction and Feature Extraction” section in STAR Methods.

| Index   | Feature Description                                                                                      | Data Type  |
|---------|----------------------------------------------------------------------------------------------------------|------------|
| F01     | Total number of fixed points in system                                                                   | Integer    |
| F02     | The number of unstable fixed points in system                                                            | Integer    |
| F03     | The average of absolute imaginary eigenvalues of all fixed points                                        | Continuous |
| F04     | The average of maximum absolute eigenvalues of all fixed points                                          | Continuous |
| F05/6/7 | The variance of the parameters in both/regularized/non-regularized part of transition matrices (A and W) | Continuous |
| F08/9   | The average of the parameters in regularized/non-regularized part of bias matrix (h)                     | Continuous |
| F10     | The number of stable cycles                                                                              | Integer    |
| F11/12  | The average of the parameters in regularized/non-regularized part of weight matrix (W)                   | Continuous |
| F13     | The sum of absolute model weights averaged across latent states                                          | Continuous |
| F14     | The average Euclidean distance between the inferred latent states over time (speed)                      | Continuous |
| F15     | The average variance of the latent states over time                                                      | Continuous |
| F16     | The frequency of system switched between different orthants in state space                               | Continuous |
| F17/18  | The average and variance over columns of regression coefficient matrix (B)                               | Continuous |

**Table S4.** Average performance of different classifiers on the HC/SCZ classification task in 5-fold cross-validation using dynamical features extracted from the model trained on 19 ROIs. This table can be compared with Figure 2a in the main text and indicates that using region pairs can achieve better classification performance.

| Model Type | Training        |        | Test            |        |
|------------|-----------------|--------|-----------------|--------|
|            | AUC             | Std.   | AUC             | Std.   |
| RF         | 1.0000          | 0.0000 | 0.5414          | 0.1029 |
| SVM        | 0.6643          | 0.0590 | 0.5781          | 0.1445 |
| DT         | Fail To Predict |        | Fail To Predict |        |
| KNN        | 0.5354          | 0.0304 | 0.5718          | 0.1229 |

**Table S5.** In the 5-fold CV, the average AUC scores of different classifiers using features extracted from different region pairs, related to Figure 2a in the main text.

| Region Pairs | SVM    |        | RF     |        | KNN    |        |
|--------------|--------|--------|--------|--------|--------|--------|
|              | AUC    | Std.   | AUC    | Std.   | AUC    | Std.   |
| 6_7          | 0.6552 | 0.1629 | 0.6649 | 0.1005 | 0.6156 | 0.0650 |
| 6_10         | 0.5850 | 0.1068 | 0.7193 | 0.0958 | 0.5534 | 0.1285 |
| 6_11         | 0.6048 | 0.1171 | 0.5336 | 0.1092 | 0.6241 | 0.1481 |
| 7_10         | 0.5418 | 0.1362 | 0.4370 | 0.2201 | 0.5824 | 0.1128 |
| 7_11         | 0.5605 | 0.0448 | 0.5802 | 0.1076 | 0.5370 | 0.0913 |
| 10_11        | 0.5634 | 0.1253 | 0.5957 | 0.0973 | 0.5048 | 0.1115 |
| 14_15        | 0.6625 | 0.0972 | 0.5194 | 0.2072 | 0.5986 | 0.1251 |
| 14_16        | 0.5435 | 0.0700 | 0.5482 | 0.1290 | 0.5063 | 0.0815 |
| 14_17        | 0.6375 | 0.0706 | 0.6750 | 0.1019 | 0.7194 | 0.0733 |
| 14_18        | 0.6000 | 0.1393 | 0.4611 | 0.0593 | 0.6153 | 0.0874 |
| 15_16        | 0.6095 | 0.1515 | 0.5802 | 0.1218 | 0.6417 | 0.0849 |
| 15_17        | 0.5210 | 0.1370 | 0.4654 | 0.0564 | 0.5485 | 0.1154 |
| 15_18        | 0.6444 | 0.1219 | 0.5611 | 0.0836 | 0.6389 | 0.1632 |
| 16_17        | 0.5251 | 0.0922 | 0.5352 | 0.1147 | 0.4494 | 0.1122 |
| 16_18        | 0.5202 | 0.1163 | 0.4861 | 0.1335 | 0.4850 | 0.1591 |
| 17_18        | 0.6022 | 0.1575 | 0.6737 | 0.1171 | 0.5665 | 0.2447 |

**Table S6.** The Spearman's correlation coefficient matrix, each cell reflects the overall correlation between all dynamical features extracted in the corresponding repeat. This table, along with Tables S7 and S8 and Figure 2b in the main text, demonstrates the weak robustness and poor reproducibility of the individual-level dynamical features.

| Repeat Index  | REP1   | REP2   | REP3   | REP4   | REP5   | REP6   | AVG REP 1/2/3 | AVG REP 4/5/6 |
|---------------|--------|--------|--------|--------|--------|--------|---------------|---------------|
| REP1          | 1.0000 | --     | --     | --     | --     | --     | --            | --            |
| REP2          | 0.0958 | 1.0000 | --     | --     | --     | --     | --            | --            |
| REP3          | 0.0996 | 0.0954 | 1.0000 | --     | --     | --     | --            | --            |
| REP4          | 0.0990 | 0.1026 | 0.1087 | 1.0000 | --     | --     | --            | --            |
| REP5          | 0.0981 | 0.1152 | 0.0924 | 0.1071 | 1.0000 | --     | --            | --            |
| REP6          | 0.1050 | 0.1060 | 0.0968 | 0.1183 | 0.1140 | 1.0000 | --            | --            |
| AVG REP 1/2/3 | --     | --     | --     | 0.1085 | 0.1202 | 0.1095 | 1.0000        | --            |
| AVG REP 4/5/6 | 0.1052 | 0.1146 | 0.1082 | --     | --     | --     | 0.1174        | 1.0000        |

**Table S7.** Average AUC scores of classifiers for the HC/SCZ classification task in 5-fold CV using features extracted from repetitions 1 to 6, as well as averaged features across different repetitions (Region pairs from DMN). This table, along with Tables S6 and S8 and Figure 2b in the main text, demonstrates the weak robustness and poor reproducibility of the individual-level dynamical features.

| Model Type | Region Pairs (DMN) | Features Version |        |        |        |        |        |        |        |        |        |        |        |            |        |            |        |
|------------|--------------------|------------------|--------|--------|--------|--------|--------|--------|--------|--------|--------|--------|--------|------------|--------|------------|--------|
|            |                    | REP_1            | Std.   | REP_2  | Std.   | REP_3  | Std.   | REP_4  | Std.   | REP_5  | Std.   | REP_6  | Std.   | REP123_AVG | Std.   | REP456_AVG | Std.   |
| KNN        | 6-7                | 0.6156           | 0.0650 | 0.5203 | 0.0812 | 0.5199 | 0.1584 | 0.5105 | 0.1113 | 0.6454 | 0.0713 | 0.6380 | 0.0793 | 0.5908     | 0.1440 | 0.6586     | 0.1197 |
| KNN        | 6-10               | 0.5534           | 0.1285 | 0.4127 | 0.0682 | 0.6176 | 0.0848 | 0.5080 | 0.1289 | 0.5009 | 0.1319 | 0.6142 | 0.0952 | 0.6264     | 0.1706 | 0.6283     | 0.1708 |
| KNN        | 6-11               | 0.6241           | 0.1481 | 0.5732 | 0.1245 | 0.6819 | 0.1516 | 0.6566 | 0.0963 | 0.5870 | 0.1330 | 0.6222 | 0.1143 | 0.5522     | 0.1578 | 0.6389     | 0.1383 |
| KNN        | 7-10               | 0.5824           | 0.1128 | 0.4983 | 0.1485 | 0.5613 | 0.0781 | 0.6569 | 0.0808 | 0.6480 | 0.0416 | 0.7074 | 0.0857 | 0.5215     | 0.1037 | 0.6847     | 0.0951 |
| KNN        | 7-11               | 0.5370           | 0.0913 | 0.5598 | 0.1125 | 0.6819 | 0.1151 | 0.5727 | 0.1455 | 0.5818 | 0.1092 | 0.6981 | 0.1409 | 0.6651     | 0.1272 | 0.7072     | 0.1152 |
| KNN        | 10-11              | 0.5048           | 0.1115 | 0.6686 | 0.0870 | 0.5667 | 0.0329 | 0.5920 | 0.1776 | 0.5889 | 0.1346 | 0.6576 | 0.0581 | 0.4745     | 0.1489 | 0.5396     | 0.1288 |
| RF         | 6-7                | 0.6649           | 0.1005 | 0.4981 | 0.1043 | 0.5383 | 0.0597 | 0.4870 | 0.0664 | 0.6914 | 0.1816 | 0.6735 | 0.0746 | 0.4314     | 0.1606 | 0.5875     | 0.1577 |
| RF         | 6-10               | 0.7193           | 0.0958 | 0.5778 | 0.1906 | 0.6120 | 0.0759 | 0.5942 | 0.0451 | 0.5332 | 0.1181 | 0.5699 | 0.2222 | 0.6131     | 0.0669 | 0.5335     | 0.1596 |
| RF         | 6-11               | 0.5336           | 0.1092 | 0.5002 | 0.0961 | 0.4772 | 0.1260 | 0.6189 | 0.1352 | 0.4865 | 0.0927 | 0.6380 | 0.1545 | 0.6252     | 0.1370 | 0.6848     | 0.1053 |
| RF         | 7-10               | 0.4370           | 0.2201 | 0.5601 | 0.1434 | 0.5792 | 0.0697 | 0.4854 | 0.1291 | 0.7005 | 0.0480 | 0.5682 | 0.1254 | 0.5672     | 0.1424 | 0.6383     | 0.0928 |
| RF         | 7-11               | 0.5802           | 0.1076 | 0.6143 | 0.0628 | 0.5833 | 0.1596 | 0.5510 | 0.0720 | 0.6099 | 0.1257 | 0.7177 | 0.1089 | 0.5226     | 0.0494 | 0.4738     | 0.1889 |
| RF         | 10-11              | 0.5957           | 0.0973 | 0.5422 | 0.0468 | 0.5304 | 0.1501 | 0.3998 | 0.1708 | 0.6361 | 0.0977 | 0.5830 | 0.0934 | 0.5282     | 0.1084 | 0.4986     | 0.1234 |
| SVM        | 6-7                | 0.6552           | 0.1629 | 0.5806 | 0.1621 | 0.6235 | 0.0858 | 0.5299 | 0.1279 | 0.6062 | 0.1299 | 0.6523 | 0.0521 | 0.6029     | 0.0695 | 0.6969     | 0.1019 |
| SVM        | 6-10               | 0.5850           | 0.1068 | 0.4392 | 0.0632 | 0.5994 | 0.0987 | 0.5180 | 0.0658 | 0.5335 | 0.0587 | 0.6254 | 0.0389 | 0.6552     | 0.1913 | 0.6321     | 0.1888 |
| SVM        | 6-11               | 0.6048           | 0.1171 | 0.6119 | 0.0585 | 0.6511 | 0.1581 | 0.7086 | 0.1350 | 0.5590 | 0.1768 | 0.6259 | 0.0924 | 0.5336     | 0.0755 | 0.6446     | 0.0813 |
| SVM        | 7-10               | 0.5418           | 0.1362 | 0.5530 | 0.1397 | 0.5427 | 0.0760 | 0.6972 | 0.0872 | 0.6809 | 0.0372 | 0.6449 | 0.0684 | 0.5004     | 0.0735 | 0.6815     | 0.1146 |
| SVM        | 7-11               | 0.5605           | 0.0448 | 0.6141 | 0.1443 | 0.6250 | 0.1001 | 0.5703 | 0.0882 | 0.5382 | 0.1145 | 0.7704 | 0.1108 | 0.6413     | 0.1461 | 0.7207     | 0.1423 |
| SVM        | 10-11              | 0.5634           | 0.1253 | 0.6468 | 0.1042 | 0.5543 | 0.1612 | 0.5337 | 0.1440 | 0.6333 | 0.0992 | 0.6915 | 0.0854 | 0.5589     | 0.0651 | 0.5648     | 0.0996 |

**Table S8.** Average AUC scores of classifiers for the HC/SCZ classification task in 5-fold CV using features extracted from repetitions 1 to 6, as well as averaged features across different repetitions (Region pairs from SN). This table, along with Tables S6 and S7 and Figure 2b in the main text, demonstrates the weak robustness and poor reproducibility of the individual-level dynamical features.

| Model Type | Region Pairs (SN) | Features Version |        |        |        |        |        |        |        |        |        |        |        |            |        |            |        |
|------------|-------------------|------------------|--------|--------|--------|--------|--------|--------|--------|--------|--------|--------|--------|------------|--------|------------|--------|
|            |                   | REP_1            | Std.   | REP_2  | Std.   | REP_3  | Std.   | REP_4  | Std.   | REP_5  | Std.   | REP_6  | Std.   | REP123_AVG | Std.   | REP456_AVG | Std.   |
| KNN        | 14_15             | 0.5986           | 0.1251 | 0.5056 | 0.0714 | 0.5642 | 0.0851 | 0.5539 | 0.0993 | 0.5574 | 0.0665 | 0.6083 | 0.1020 | 0.6189     | 0.1004 | 0.5672     | 0.1395 |
| KNN        | 14_16             | 0.5063           | 0.0815 | 0.5764 | 0.0708 | 0.5250 | 0.1438 | 0.6770 | 0.1489 | 0.5532 | 0.0781 | 0.5964 | 0.0939 | 0.5115     | 0.1178 | 0.5674     | 0.0395 |
| KNN        | 14_17             | 0.7194           | 0.0733 | 0.5819 | 0.0824 | 0.6064 | 0.1012 | 0.6159 | 0.1571 | 0.6058 | 0.1400 | 0.5800 | 0.0747 | 0.6286     | 0.0813 | 0.6489     | 0.0748 |
| KNN        | 14_18             | 0.6153           | 0.0874 | 0.5694 | 0.0274 | 0.5417 | 0.1302 | 0.5956 | 0.1032 | 0.5000 | 0.1093 | 0.4801 | 0.0620 | 0.5157     | 0.1147 | 0.5404     | 0.0606 |
| KNN        | 15_16             | 0.6417           | 0.0849 | 0.5514 | 0.0384 | 0.6096 | 0.1013 | 0.5097 | 0.0764 | 0.7148 | 0.1150 | 0.5957 | 0.1004 | 0.6338     | 0.0968 | 0.4733     | 0.1305 |
| KNN        | 15_17             | 0.5485           | 0.1154 | 0.5750 | 0.0453 | 0.5981 | 0.1653 | 0.5375 | 0.1711 | 0.6039 | 0.1081 | 0.4889 | 0.0790 | 0.5722     | 0.0716 | 0.5917     | 0.0438 |
| KNN        | 15_18             | 0.6389           | 0.1632 | 0.5993 | 0.0827 | 0.4878 | 0.0933 | 0.6501 | 0.1251 | 0.5361 | 0.1730 | 0.5646 | 0.1294 | 0.5927     | 0.1844 | 0.5344     | 0.0976 |
| KNN        | 16_17             | 0.4494           | 0.1122 | 0.5351 | 0.1814 | 0.5417 | 0.1294 | 0.5627 | 0.0573 | 0.5455 | 0.1004 | 0.6820 | 0.1072 | 0.5885     | 0.0895 | 0.6486     | 0.1090 |
| KNN        | 16_18             | 0.4850           | 0.1591 | 0.6775 | 0.1751 | 0.5351 | 0.1281 | 0.5057 | 0.1476 | 0.5107 | 0.1488 | 0.4458 | 0.1029 | 0.6310     | 0.1036 | 0.4991     | 0.0687 |
| KNN        | 17_18             | 0.5665           | 0.2447 | 0.6125 | 0.0910 | 0.5164 | 0.1532 | 0.5897 | 0.1115 | 0.5602 | 0.1466 | 0.5127 | 0.0798 | 0.5866     | 0.1216 | 0.5500     | 0.1005 |
| RF         | 14_15             | 0.5194           | 0.2072 | 0.6497 | 0.1411 | 0.6047 | 0.0846 | 0.7228 | 0.0893 | 0.5665 | 0.1550 | 0.6456 | 0.1017 | 0.5973     | 0.0336 | 0.6781     | 0.1245 |
| RF         | 14_16             | 0.5482           | 0.1290 | 0.5861 | 0.0840 | 0.5306 | 0.0624 | 0.6667 | 0.1214 | 0.4191 | 0.0947 | 0.5193 | 0.1234 | 0.6113     | 0.0874 | 0.5764     | 0.0754 |
| RF         | 14_17             | 0.6750           | 0.1019 | 0.5139 | 0.0886 | 0.6647 | 0.1240 | 0.7332 | 0.0889 | 0.5564 | 0.1894 | 0.6443 | 0.0953 | 0.5824     | 0.0541 | 0.6188     | 0.0593 |
| RF         | 14_18             | 0.4611           | 0.0593 | 0.6886 | 0.1393 | 0.6269 | 0.1222 | 0.4578 | 0.1044 | 0.5682 | 0.1160 | 0.5534 | 0.1234 | 0.6150     | 0.0680 | 0.5533     | 0.1179 |
| RF         | 15_16             | 0.5802           | 0.1218 | 0.6472 | 0.0988 | 0.6790 | 0.1153 | 0.6108 | 0.0898 | 0.5417 | 0.1205 | 0.4694 | 0.0934 | 0.5529     | 0.0965 | 0.5777     | 0.1492 |
| RF         | 15_17             | 0.4654           | 0.0564 | 0.5926 | 0.1748 | 0.6310 | 0.0728 | 0.5198 | 0.1207 | 0.6549 | 0.0958 | 0.6181 | 0.0905 | 0.6168     | 0.0451 | 0.6107     | 0.1454 |
| RF         | 15_18             | 0.5611           | 0.0836 | 0.5918 | 0.0630 | 0.4399 | 0.1110 | 0.6043 | 0.1127 | 0.6248 | 0.1543 | 0.6413 | 0.0632 | 0.5190     | 0.1153 | 0.6353     | 0.1550 |
| RF         | 16_17             | 0.5352           | 0.1147 | 0.6056 | 0.1410 | 0.5167 | 0.0885 | 0.5719 | 0.1225 | 0.5273 | 0.1533 | 0.5583 | 0.0514 | 0.7388     | 0.1060 | 0.6883     | 0.0433 |
| RF         | 16_18             | 0.4861           | 0.1335 | 0.6522 | 0.0778 | 0.7188 | 0.1002 | 0.6168 | 0.0671 | 0.5714 | 0.0804 | 0.4228 | 0.1620 | 0.6357     | 0.1434 | 0.5222     | 0.1027 |
| RF         | 17_18             | 0.6737           | 0.1171 | 0.5986 | 0.0515 | 0.6986 | 0.0718 | 0.5719 | 0.1280 | 0.4723 | 0.1163 | 0.6289 | 0.1102 | 0.5902     | 0.0786 | 0.6023     | 0.1103 |
| SVM        | 14_15             | 0.6625           | 0.0972 | 0.5361 | 0.0779 | 0.5698 | 0.0292 | 0.6551 | 0.0940 | 0.5881 | 0.0742 | 0.6992 | 0.0831 | 0.5098     | 0.1043 | 0.5916     | 0.0994 |
| SVM        | 14_16             | 0.5435           | 0.0700 | 0.6528 | 0.0288 | 0.5514 | 0.0981 | 0.6526 | 0.1920 | 0.5472 | 0.1281 | 0.5924 | 0.0884 | 0.5236     | 0.1029 | 0.5861     | 0.0766 |
| SVM        | 14_17             | 0.6375           | 0.0706 | 0.5583 | 0.0636 | 0.5961 | 0.0522 | 0.6179 | 0.1451 | 0.5561 | 0.1432 | 0.5835 | 0.1177 | 0.6449     | 0.0894 | 0.6412     | 0.1321 |
| SVM        | 14_18             | 0.6000           | 0.1393 | 0.5583 | 0.1256 | 0.4657 | 0.0904 | 0.5974 | 0.1192 | 0.5139 | 0.0977 | 0.5843 | 0.1488 | 0.5368     | 0.1065 | 0.5190     | 0.0546 |
| SVM        | 15_16             | 0.6095           | 0.1515 | 0.6167 | 0.1284 | 0.6008 | 0.0524 | 0.5129 | 0.0918 | 0.6850 | 0.0659 | 0.5748 | 0.1244 | 0.5371     | 0.0673 | 0.4956     | 0.1415 |
| SVM        | 15_17             | 0.5210           | 0.1370 | 0.6422 | 0.0561 | 0.6153 | 0.0823 | 0.6770 | 0.1050 | 0.6123 | 0.0938 | 0.5012 | 0.0744 | 0.5570     | 0.0640 | 0.6146     | 0.1917 |
| SVM        | 15_18             | 0.6444           | 0.1219 | 0.6462 | 0.1180 | 0.4831 | 0.1011 | 0.6581 | 0.1045 | 0.5127 | 0.1039 | 0.6106 | 0.0314 | 0.6286     | 0.1708 | 0.5114     | 0.1308 |
| SVM        | 16_17             | 0.5251           | 0.0922 | 0.5526 | 0.1567 | 0.6000 | 0.1196 | 0.5554 | 0.0789 | 0.4986 | 0.0801 | 0.6577 | 0.0865 | 0.6523     | 0.1325 | 0.5664     | 0.1138 |
| SVM        | 16_18             | 0.5202           | 0.1163 | 0.6772 | 0.1254 | 0.5769 | 0.1611 | 0.4989 | 0.0856 | 0.5421 | 0.1649 | 0.4860 | 0.0667 | 0.6372     | 0.0873 | 0.5415     | 0.1429 |
| SVM        | 17_18             | 0.6022           | 0.1575 | 0.6847 | 0.0933 | 0.5694 | 0.0810 | 0.6347 | 0.1063 | 0.5614 | 0.0706 | 0.5137 | 0.0820 | 0.5726     | 0.1003 | 0.6143     | 0.0951 |

**Table S9.** The full performance scores of the RF models using the graph clustering method in SCZ/HC, MDD/HC and SCZ/(HC+MDD) classification tasks, related to Figure 3b in the main text.

| Task         | $F_{cut}$    | Dataset Size | P-value         | Sensitivity   | Specificity   | ACC           | AUC           |
|--------------|--------------|--------------|-----------------|---------------|---------------|---------------|---------------|
| SCZ/HC       | 0.530        | 88           | 0.3512          | 0.5772        | 0.5405        | 0.5597        | 0.5613        |
|              | 0.535        | 88           | 0.1494          | 0.6348        | 0.5429        | 0.5909        | 0.5896        |
|              | 0.540        | 87           | 0.3195          | 0.6011        | 0.5171        | 0.5615        | 0.5595        |
|              | 0.545        | 83           | 0.1822          | 0.5593        | 0.6125        | 0.5849        | 0.5861        |
|              | 0.550        | 78           | 0.6908          | 0.5037        | 0.5487        | 0.5256        | 0.5263        |
|              | 0.555        | 69           | 0.3776          | 0.5576        | 0.5681        | 0.5630        | 0.5628        |
|              | 0.560        | 43           | 0.0010          | 0.7588        | 0.7904        | 0.7779        | 0.7687        |
|              | <b>0.565</b> | <b>28</b>    | <b>0.0009</b>   | <b>0.6923</b> | <b>0.9467</b> | <b>0.8286</b> | <b>0.8501</b> |
|              | 0.570        | 25           | 0.0713          | 0.6955        | 0.7464        | 0.7240        | 0.7219        |
| MDD/HC       | 0.530        | 86           | 0.3889          | 0.5955        | 0.5238        | 0.5605        | 0.5600        |
|              | 0.535        | 86           | 0.0567          | 0.4352        | 0.3476        | 0.3924        | 0.6093        |
|              | 0.540        | 84           | 0.5919          | 0.4279        | 0.4915        | 0.4589        | 0.5405        |
|              | 0.545        | 82           | 0.7665          | 0.4083        | 0.5375        | 0.4713        | 0.5275        |
|              | 0.550        | 75           | 0.0118          | 0.6838        | 0.6250        | 0.6540        | 0.6549        |
|              | 0.555        | 68           | 0.0042          | 0.7219        | 0.6472        | 0.6824        | 0.6845        |
|              | 0.560        | 37           | 0.2389          | 0.6273        | 0.6385        | 0.6351        | 0.6136        |
|              | <b>0.565</b> | <b>22</b>    | <b>0.0702</b>   | <b>0.8286</b> | <b>0.6900</b> | <b>0.7341</b> | <b>0.7266</b> |
|              | 0.570        | 18           | 0.8904          | 0.5000        | 0.6321        | 0.6028        | 0.5498        |
| SCZ/(HC+MDD) | 0.530        | 132          | 0.5895          | 0.4457        | 0.4942        | 0.4773        | 0.4726        |
|              | 0.535        | 132          | 0.2257          | 0.5587        | 0.5698        | 0.5659        | 0.5586        |
|              | 0.540        | 130          | 0.5283          | 0.5609        | 0.5042        | 0.5242        | 0.5298        |
|              | 0.545        | 125          | 0.3414          | 0.5442        | 0.5591        | 0.5540        | 0.5468        |
|              | 0.550        | 115          | 0.7750          | 0.4475        | 0.5320        | 0.5026        | 0.4906        |
|              | 0.555        | 101          | 0.7980          | 0.5303        | 0.4507        | 0.4767        | 0.4915        |
|              | 0.560        | 54           | 1.80E-05        | 0.7882        | 0.8446        | 0.8269        | 0.7985        |
|              | <b>0.565</b> | <b>35</b>    | <b>3.80E-05</b> | <b>0.8731</b> | <b>0.8841</b> | <b>0.8800</b> | <b>0.8704</b> |
|              | 0.570        | 29           | 0.0027          | 0.7682        | 0.8694        | 0.8310        | 0.8223        |
|              | 0.575        | 26           | 0.0105          | 0.7722        | 0.8176        | 0.8019        | 0.7818        |
| 0.580        | 10           | 0.9321       | 0.5750          | 0.4000        | 0.4700        | 0.5531        |               |

**Table S10.** The performance of RF classifiers using features filtered and integrated via hypothesis-driven pipeline on SCZ/HC, MDD/HC and SCZ/non-SCZ classification tasks. This table can be compared with Table S9 and Figure 3b in the main text and indicates that our proposed hypothesis-free pipeline does not improve classification performance compared to the hypothesis-driven pipeline.

| Task         | Dataset Size | P-value | Sensitivity | Specificity | ACC    | AUC    |
|--------------|--------------|---------|-------------|-------------|--------|--------|
| SCZ/HC       | 88           | 0.0009  | 0.7370      | 0.6357      | 0.6886 | 0.6886 |
| MDD/HC       | 86           | 0.3465  | 0.6182      | 0.5048      | 0.5628 | 0.5624 |
| SCZ/(HC+MDD) | 132          | 0.0480  | 0.6065      | 0.5890      | 0.5951 | 0.5890 |

## References:

1. Koppe, G., Toutounji, H., Kirsch, P., Lis, S., and Durstewitz, D. (2019). Identifying nonlinear dynamical systems via generative recurrent neural networks with applications to fMRI. *PLoS computational biology* 15, e1007263.
2. Thome, J., Steinbach, R., Grosskreutz, J., Durstewitz, D., and Koppe, G. (2022). Classification of amyotrophic lateral sclerosis by brain volume, connectivity, and network dynamics. *Human brain mapping* 43, 681-699.
